# Supplementary material
Source: Research Square preprint supplement (doi:10.21203/rs.3.rs-8524612/v1)
Supplement: Supplementary file 1 [file 7012dc7cdef69542d0ff28eb.docx]

**Original Data from CDC Abortion Surveillance**

1. Koonin LM, Smith JC, Ramick M, Lawson HW. Abortion surveillance--United States, 1989. MMWR CDC Surveill Summ. 1992 Sep 4;41(5):1-33. PMID: 1435686.
2. Koonin LM, Smith JC, Ramick M. Abortion surveillance--United States, 1990. MMWR CDC Surveill Summ. 1993 Dec 17;42(6):29-57. PMID: 8139526.
3. Koonin LM, Smith JC, Ramick M. Abortion surveillance--United States, 1991. MMWR CDC Surveill Summ. 1995 May 5;44(2):23-53. Erratum in: MMWR Morb Mortal Wkly Rep 1995 Jun 30;44(25):479. PMID
4. Koonin LM, Smith JC, Ramick M, Green CA. Abortion surveillance--United States, 1992. MMWR CDC Surveill Summ. 1996 May 3;45(3):1-36.
5. Koonin LM, Smith JC, Ramick M, Strauss LT, Hopkins FW. Abortion surveillance--United States, 1993 and 1994. MMWR CDC Surveill Summ. 1997 Aug 8;46(4):37-98. PMID: 9259216.
6. Koonin LM, Smith JC, Ramick M, Strauss LT. Abortion surveillance--United States, 1995. MMWR CDC Surveill Summ. 1998 Jul 3;47(2):31-40. PMID: 9665158.
7. Centers for Disease Control and Prevention (CDC). Abortion surveillance: preliminary analysis--United States, 1996. MMWR Morb Mortal Wkly Rep. 1998 Dec 4;47(47):1025-8, 1035. PMID: 9853940.
8. Koonin LM, Strauss LT, Chrisman CE, Parker WY. Abortion surveillance--United States, 1997. MMWR CDC Surveill Summ. 2000 Dec 8;49(11):1-43. PMID: 11130580.
9. Herndon J, Strauss LT, Whitehead S, Parker WY, Bartlett L, Zane S. Abortion surveillance--United States, 1998. MMWR Surveill Summ. 2002 Jun 7;51(3):1-32. PMID: 12369584.
10. Strauss LT, Herndon J, Chang J, Parker WY, Levy DA, Bowens SB, Zane SB, Berg CJ; CDC. Abortion surveillance--United States, 2001. MMWR Surveill Summ. 2004 Nov 26;53(9):1-32.
11. Strauss LT, Herndon J, Chang J, Parker WY, Bowens SV, Berg CJ. Abortion surveillance--United States, 2002. MMWR Surveill Summ. 2005 Nov 25;54(7):1-31. PMID: 16304556.
12. Strauss LT, Gamble SB, Parker WY, Cook DA, Zane SB, Hamdan S; Centers for Disease Control and Prevention. Abortion surveillance--United States, 2003. MMWR Surveill Summ. 2006 Nov 24;55(11):1-32.
13. Strauss LT, Gamble SB, Parker WY, Cook DA, Zane SB, Hamdan S; Centers for Disease Control and Prevention (CDC). Abortion surveillance--United States, 2004. MMWR Surveill Summ. 2007 Nov 23;56(9):1-33
14. Gamble SB, Strauss LT, Parker WY, Cook DA, Zane SB, Hamdan S; Centers for Disease Control and Prevention (CDC). Abortion surveillance--United States, 2005. MMWR Surveill Summ. 2008 Nov 28;57(13):1-32. PMID: 19037196.
15. Pazol K, Gamble SB, Parker WY, Cook DA, Zane SB, Hamdan S; Centers for Disease Control and Prevention (CDC). Abortion surveillance - United States, 2006. MMWR Surveill Summ. 2009 Nov 27;58(8):1-35. Erratum in: MMWR Surveill Summ. 2010 May 14;59(18):561.
16. Pazol K, Zane S, Parker WY, Hall LR, Gamble SB, Hamdan S, Berg C, Cook DA; Centers for Disease Control and Prevention (CDC). Abortion surveillance - United States, 2007. MMWR Surveill Summ. 2011 Feb 25;60(1):1-42. Erratum in: MMWR Surveill Summ. 2011 Mar 18;60(10):315. PMID: 21346710.
17. Pazol K, Zane SB, Parker WY, Hall LR, Berg C, Cook DA; Centers for Disease Control and Prevention (CDC). Abortion surveillance--United States, 2008. MMWR Surveill Summ. 2011 Nov 25;60(15):1-41. PMID: 22108620.
18. Pazol K, Creanga AA, Zane SB, Burley KD, Jamieson DJ; Centers for Disease Control and Prevention (CDC). Abortion surveillance--United States, 2009. MMWR Surveill Summ. 2012 Nov 23;61(8):1-44. PMID: 23169413.
19. Pazol K, Creanga AA, Burley KD, Hayes B, Jamieson DJ; Centers for Disease Control and Prevention (CDC). Abortion surveillance - United States, 2010. MMWR Surveill Summ. 2013 Nov 29;62(8):1-44. Erratum in: MMWR Surveill Summ. 2014 Jan 3;62(51):1053. PMID: 24280963.
20. Jatlaoui TC, Shah J, Mandel MG, Krashin JW, Suchdev DB, Jamieson DJ, Pazol K. Abortion Surveillance - United States, 2014. MMWR Surveill Summ. 2018 Nov 23;66(25):1-44. doi: 10.15585/mmwr.ss6625a1. PMID: 30462631; PMCID: PMC6290801.
21. Jatlaoui TC, Boutot ME, Mandel MG, Whiteman MK, Ti A, Petersen E, Pazol K. Abortion Surveillance - United States, 2015. MMWR Surveill Summ. 2018 Nov 23;67(13):1-45. doi: 10.15585/mmwr.ss6713a1. Erratum in: MMWR Morb Mortal Wkly Rep. 2020 Dec 04;69(48):1836. doi: 10.15585/mmwr.mm6948a11. PMID: 30462632; PMCID: PMC6289084.
22. Jatlaoui TC, Eckhaus L, Mandel MG, Nguyen A, Oduyebo T, Petersen E, Whiteman MK. Abortion Surveillance - United States, 2016. MMWR Surveill Summ. 2019 Nov 29;68(11):1-41. doi: 10.15585/mmwr.ss6811a1. Erratum in: MMWR Morb Mortal Wkly Rep. 2020 Dec 04;69(48):1837. doi: 10.15585/mmwr.mm6948a12. PMID: 31774741.
23. Kortsmit K ; Jatlaoui TC ; Mandel MG, et al. Abortion Surveillance — United States, 2018 [17 Supplementary Tables] 11/27/2020
24. Kortsmit K, Jatlaoui TC, Mandel MG, Reeves JA, Oduyebo T, Petersen E, Whiteman MK. Abortion Surveillance - United States, 2018. MMWR Surveill Summ. 2020 Nov 27;69(7):1-29. doi: 10.15585/mmwr.ss6907a1. PMID: 33237897; PMCID: PMC7713711.
25. Kortsmit K, Mandel MG, Reeves JA, Clark E, Pagano HP, Nguyen A, Petersen EE, Whiteman MK. Abortion Surveillance - United States, 2019. MMWR Surveill Summ. 2021 Nov 26;70(9):1-29.
26. Kortsmit K, Nguyen AT, Mandel MG, Clark E, Hollier LM, Rodenhizer J, Whiteman MK. Abortion Surveillance - United States, 2020. MMWR Surveill Summ. 2022 Nov 25;71(10):1-27. doi: 10.15585/mmwr.ss7110a1. PMID: 36417304; PMCID: PMC9707346.
27. Kortsmit K, Nguyen AT, Mandel MG, Hollier LM, Ramer S, Rodenhizer J, Whiteman MK. Abortion Surveillance - United States, 2021. MMWR Surveill Summ. 2023 Nov 24;72(9):1-29. doi: 10.15585/mmwr.ss7209a1
28. Ramer S, Nguyen AT, Hollier LM, Rodenhizer J, Warner L, Whiteman MK. Abortion Surveillance - United States, 2022. MMWR Surveill Summ. 2024 Nov 28;73(7):1-28. doi: 10.15585/mmwr.ss7307a1. PMID: 39602470; PMCID: PMC11616987.
29. Top of Form
